# Supplementary material for: Bipyridine hydrogel for selective and visible detection and absorption of Cd2+
Source: Royal Society of Chemistry journal article supplement (doi:10.1039/c4nr06467d), 2015-01-01
Supplement: c4nr06467d1.pdf [file c4nr06467d1.pdf]

## Electronic Supplementary Information

# Bipyridine hydrogel for selective and visible detection and absorption of Cd<sup>2+</sup>

*Qingqing Miao,<sup>a</sup> Ziyue Wu,<sup>c</sup> Zijuan Hai,<sup>a</sup> Changlu Tao,<sup>d</sup> Qingpan Yuan,<sup>a</sup> Yadi Gong,<sup>a</sup> Yafeng Guan,<sup>b</sup> Jun Jiang,<sup>\*c</sup> and Gaolin Liang<sup>\*a</sup>*

<sup>a</sup>CAS Key Laboratory of Soft Matter Chemistry, Department of Chemistry, University of Science and Technology of China, Hefei, Anhui 230026, China

<sup>b</sup>Key Laboratory of Separation Sciences for Analytical Chemistry, Dalian Institute of Chemical Physics, Chinese Academy of Sciences, Dalian 116023, China

<sup>c</sup>Department of Chemical Physics, University of Science and Technology of China, 96 Jinzhai Road, Hefei, Anhui 230026, China.

<sup>d</sup>Center for Integrative Imaging, Hefei National Laboratory for Physical Sciences at the Microscale & School of Life Sciences, University of Science and Technology of China, Hefei, Anhui 230026, China

E-mail: jiangjl@ustc.edu.cn (J.J.), gliang@ustc.edu.cn (G.-L. L.).

## Contents:

1. Synthetic route for **1**.
2. Supporting Figures.
3. Supporting Tables.
4. References.

## 1. Synthetic route for **1**.

*Preparation of 1.*

**Scheme S1.** Synthetic route for compound **1**.

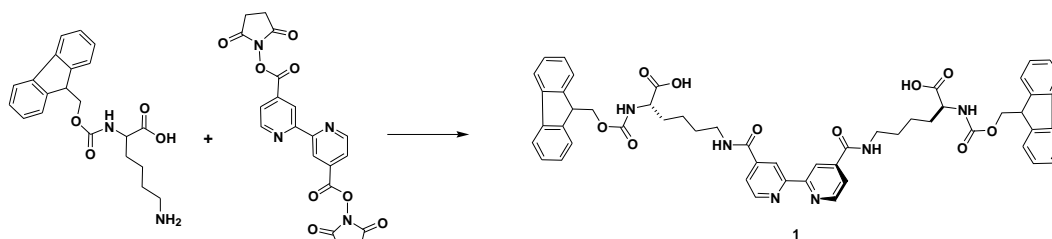

Synthesis of 4,4'-Dicarboxysuccinimidyl-2,2'-bipyridine:

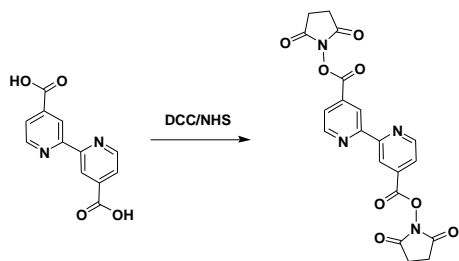

## 2. Supporting Figures.

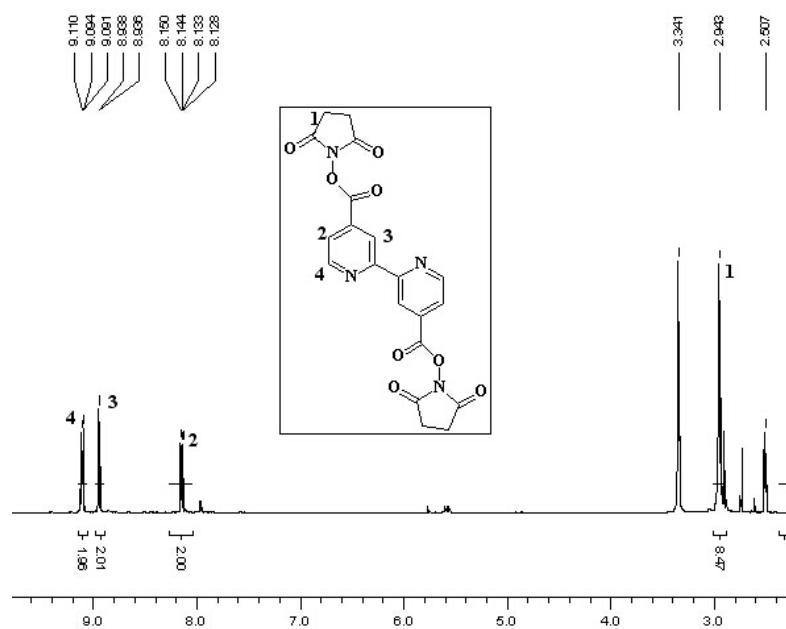

**Figure S1.**  $^1\text{H}$  NMR spectrum of compound 4,4'-dicarboxysuccinimidyl-2,2'-bipyridine.

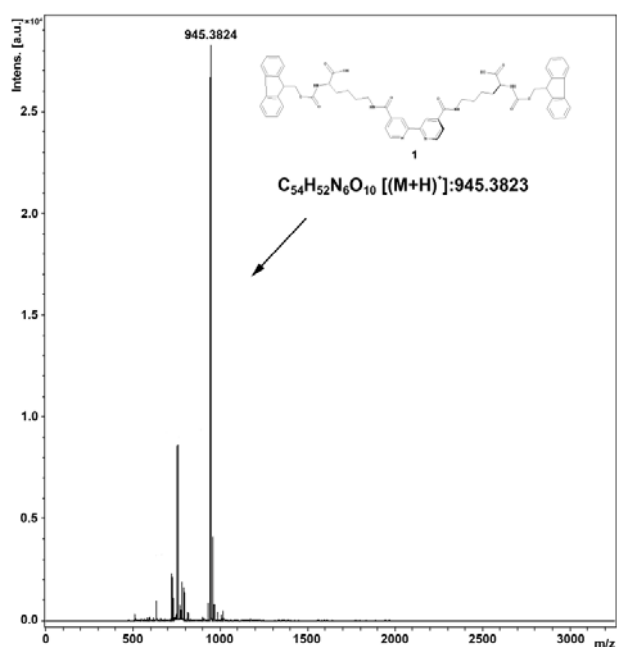

**Figure S2.** HR-MALDI-TOF/MS spectrum of **1**.

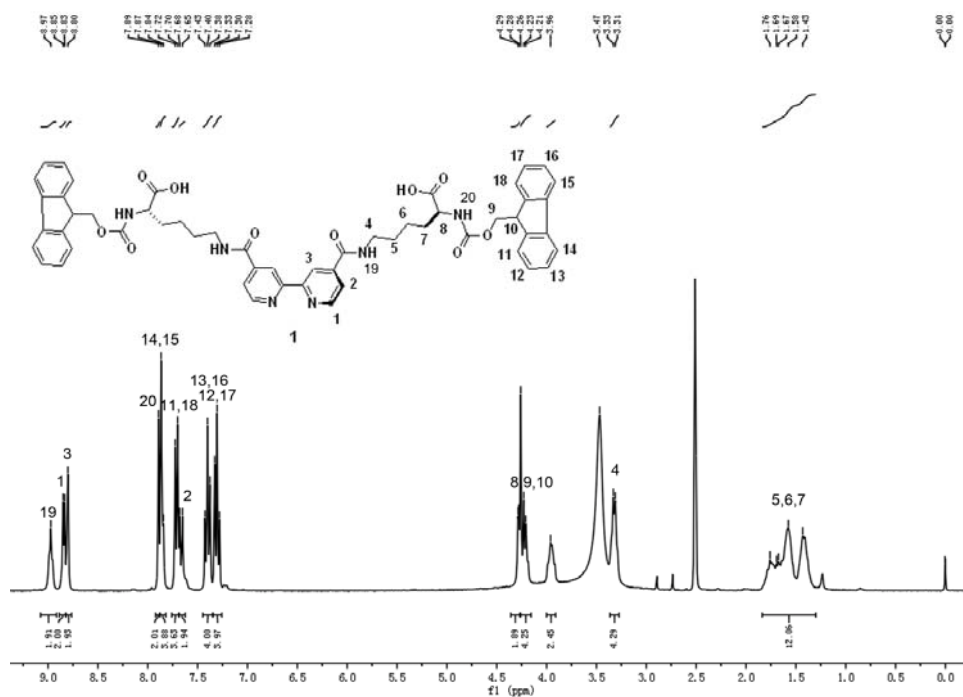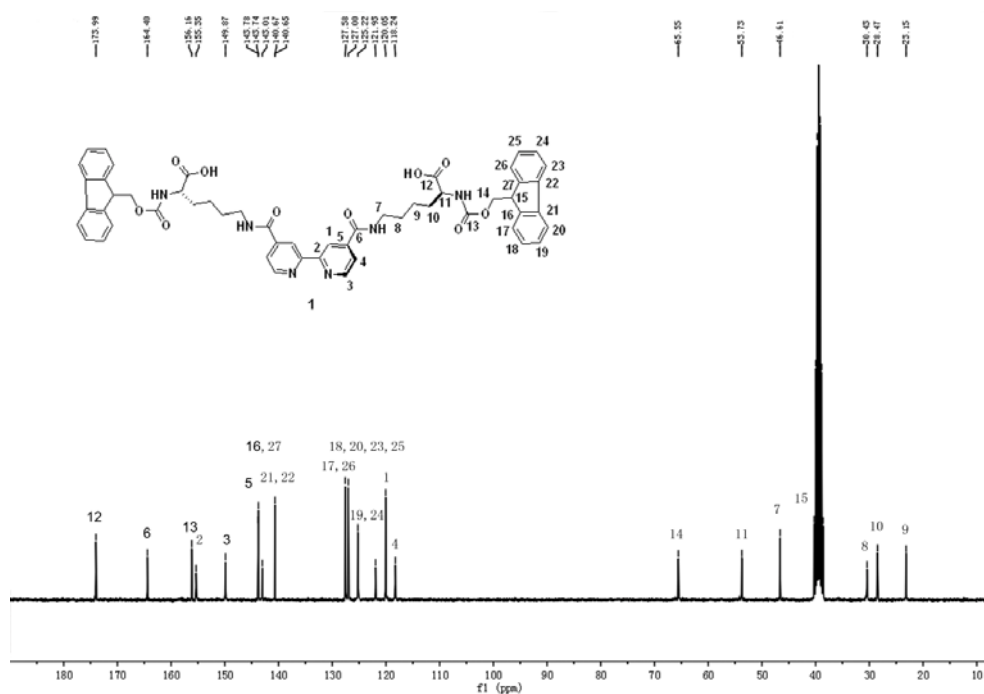

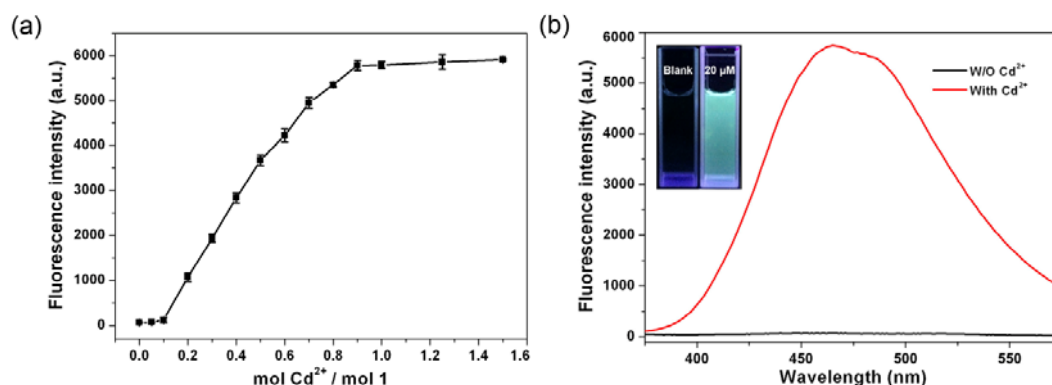

**Figure S5.** (a) Correlation of fluorescence intensities at 470 nm of **1** (20  $\mu\text{M}$ ,  $\lambda_{\text{ex}} = 300$  nm) in the presence of various concentrations of  $\text{Cd}^{2+}$  (0, 1, 2, 4, 6, 8, 10, 12, 14, 16, 18, 20, 25 or 30  $\mu\text{M}$ ) in phosphate buffer (10 mM, pH 7.5) containing 10% ethanol at RT. (b) Fluorescence spectra of **1** (20  $\mu\text{M}$ ,  $\lambda_{\text{ex}} = 300$  nm) in the presence of 0, or 20  $\mu\text{M}$   $\text{Cd}^{2+}$  in phosphate buffer (10 mM, pH 7.5) containing 10% ethanol at RT. The inset fluorescent photographs show the fluorescence changes of **1** at 20  $\mu\text{M}$  before and after addition of 20  $\mu\text{M}$   $\text{Cd}^{2+}$  under a UV lamp.

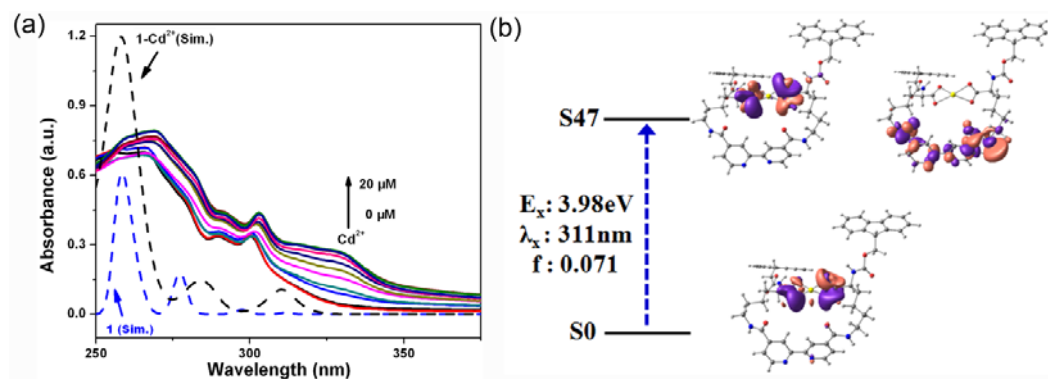

**Figure S6.** (a) UV-vis absorption spectra of **1** (20  $\mu\text{M}$ ) in the presence of various concentrations of  $\text{Cd}^{2+}$  in phosphate buffer (10 mM, pH 7.5) containing 10% ethanol at RT. The simulated (Sim.) spectra of **1** and **1-Cd<sup>2+</sup>** are given with dashed curves. (b) The transition energy and orbitals responsible for the absorption peak at around 311 nm of **1-Cd<sup>2+</sup>**.

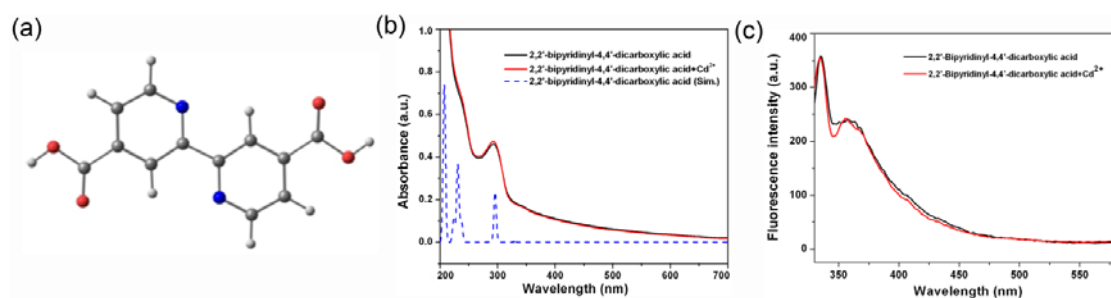

**Figure S7.** (a) Theoretically optimized molecular structure of 2,2'-bipyridinyl-4,4'-dicarboxylic. (b) UV-vis absorption spectra of 2,2'-bipyridinyl-4,4'-dicarboxylic acid (20  $\mu$ M) in the presence of Cd<sup>2+</sup> at 0, or 20  $\mu$ M in phosphate buffer (10 mM, pH 7.5) containing 10% ethanol at RT. The simulated spectrum is given as blue dashed line. (c) The corresponding fluorescence spectra of 2,2'-bipyridinyl-4,4'-dicarboxylic acid (20  $\mu$ M) in the presence of Cd<sup>2+</sup> at 0, or 20  $\mu$ M, excited at 300 nm.

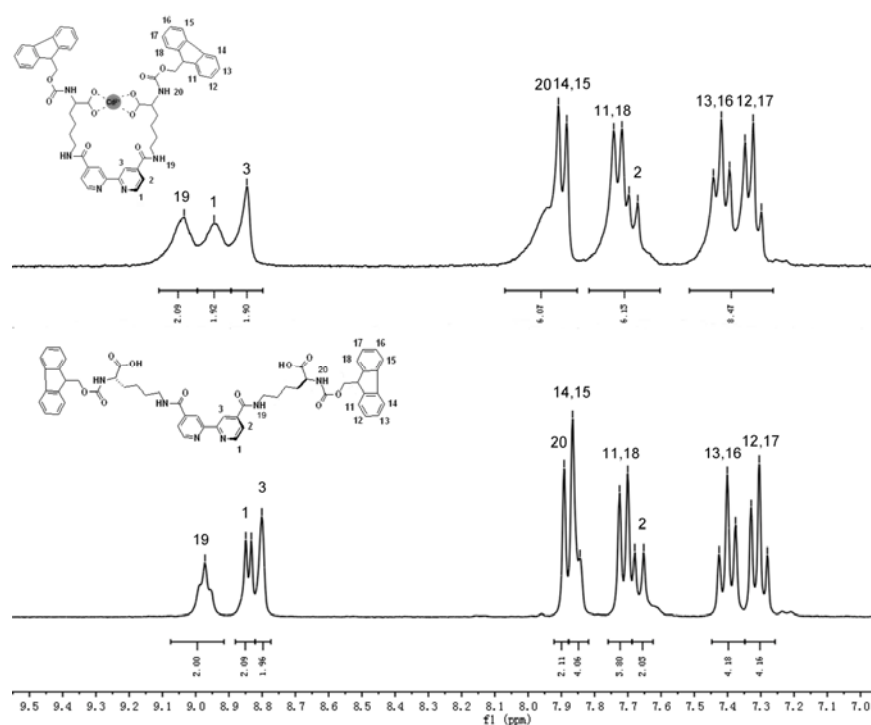

**Figure S8.** <sup>1</sup>H NMR spectra (300 MHz) of **1** (bottom) and **1** upon addition of Cd<sup>2+</sup> (top) in d<sub>6</sub>-DMSO.

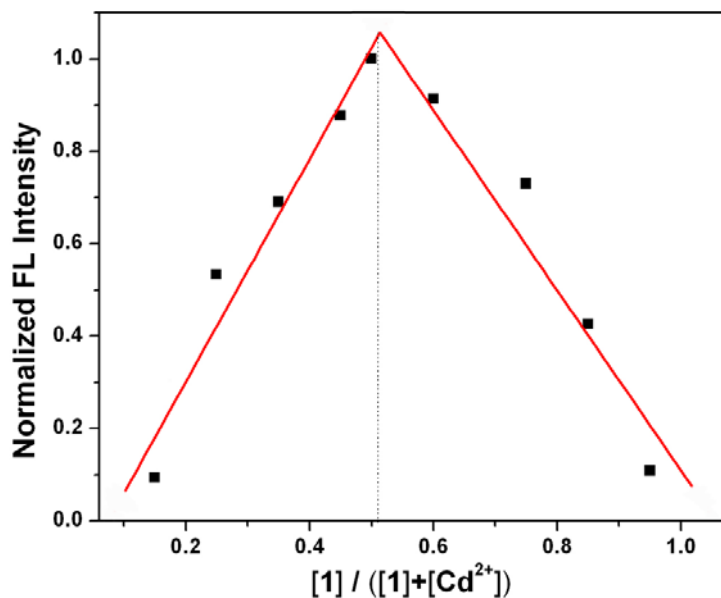

**Figure S9.** Job' plots of fluorescence intensity changes at varying mole ratios of **1** with  $\text{Cd}^{2+}$  ( $[\mathbf{1}] + [\text{Cd}^{2+}] = 40 \mu\text{M}$ ).

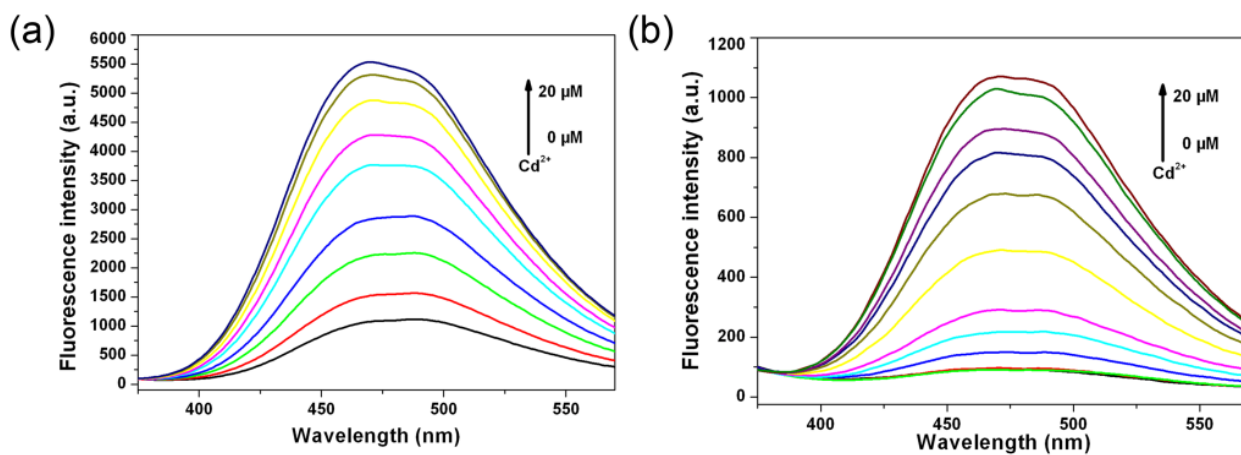

**Figure S10.** (a) Fluorescence spectra of **1** ( $20 \mu\text{M}$ ,  $\lambda_{\text{ex}} = 300 \text{ nm}$ ) in the presence of various concentrations of  $\text{Cd}^{2+}$  in phosphate buffer (10 mM, pH 6) containing 10% ethanol at room temperature. (b) Fluorescence spectra of **1** ( $20 \mu\text{M}$ ,  $\lambda_{\text{ex}} = 300 \text{ nm}$ ) in the presence of various concentrations of  $\text{Cd}^{2+}$  in phosphate buffer (10 mM, pH 9) containing 10% ethanol at room temperature.

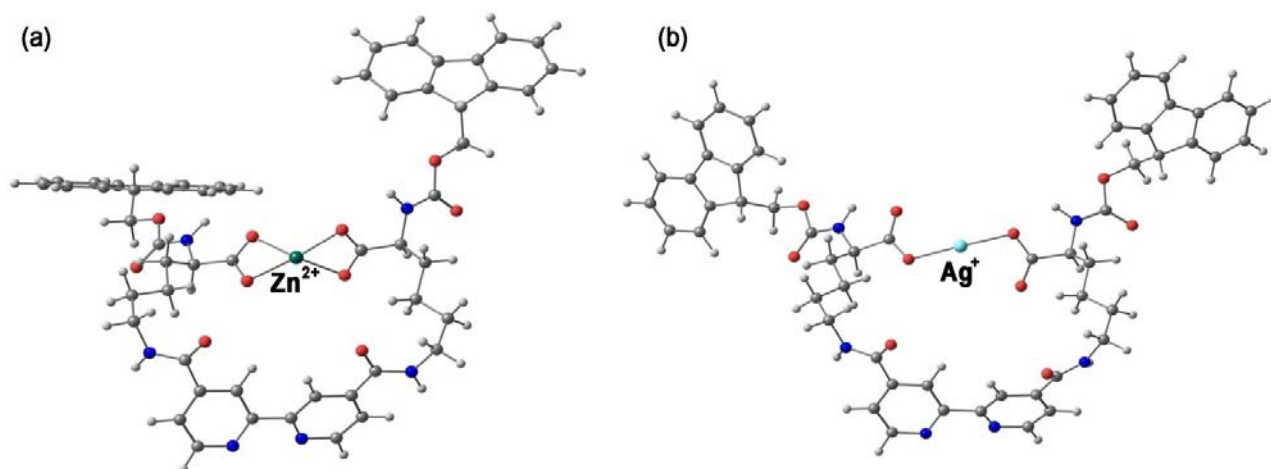

**Figure S11.** (a) Zn<sup>2+</sup> forms effective bondings with four oxygen atoms in the **1**-Zn<sup>2+</sup> complex. (b) Ag<sup>+</sup> forms weakly bondings with two oxygen atoms in the **1**-Ag<sup>+</sup> complex.

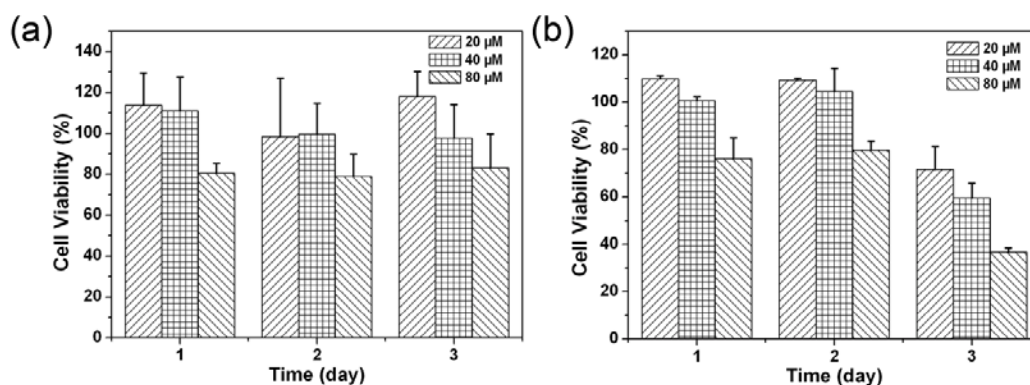

**Figure S12.** MTT assay of **1** on (a) HepG2 cells, and (b) LoVo cells. Cell viability values (%) estimated by MTT proliferation test at concentrations of 20, 40 and 80 μM of **1**. HepG2 cells, or LoVo cells were cultured in the presence of **1** for 1, 2 and 3 day at 37 °C under 5% CO<sub>2</sub>. These experiments were performed in triplicate. Results are representative of three independent experiments. Error bars represent standard deviations.



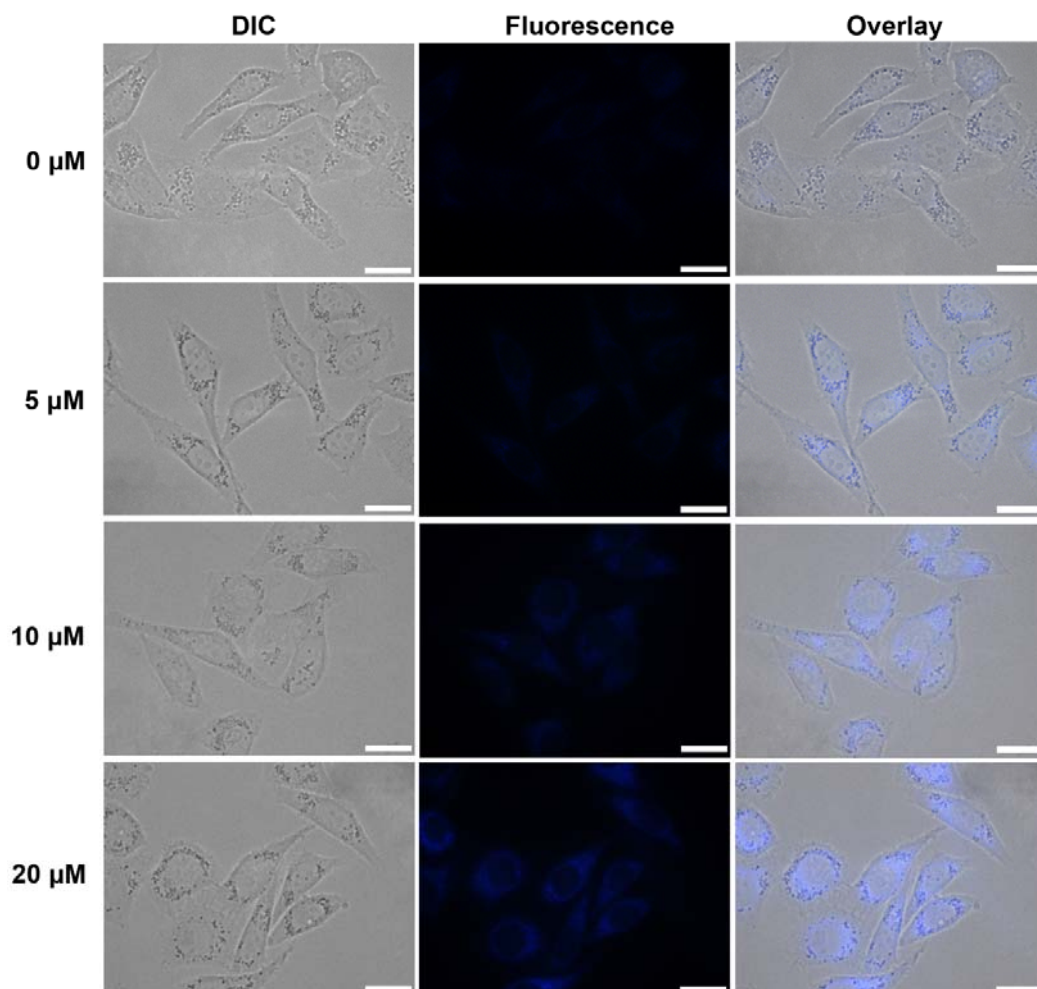

**Figure S13.** Differential interference contrast (DIC) images (left), fluorescence images (middle, DAPI channel), and merged images (right) of LoVo cells incubated with 0, 5, 10, or 20  $\mu\text{M}$  of  $\text{Cd}^{2+}$  in serum-free medium for 30 min at 37  $^{\circ}\text{C}$ , washed with PBS for three times, then incubated with 20  $\mu\text{M}$  **1** in serum-free medium for 0.5 h at 37  $^{\circ}\text{C}$  prior to imaging, respectively. Scale bar: 20  $\mu\text{m}$ .

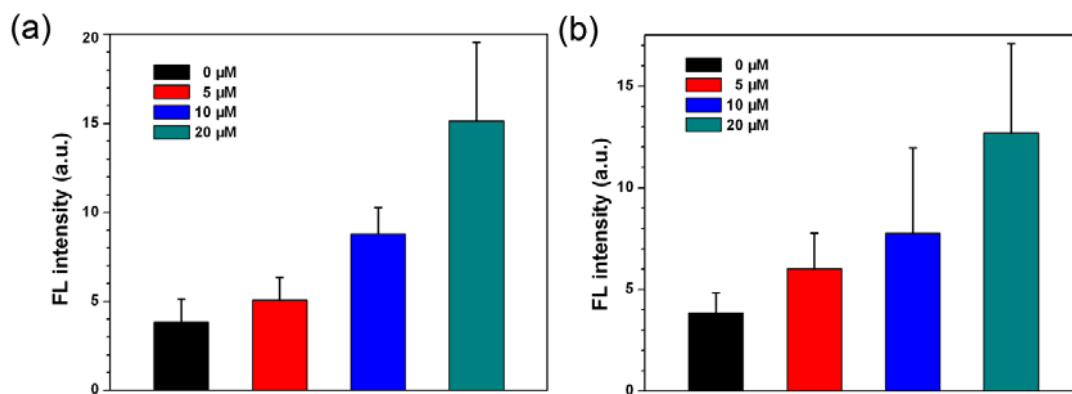

**Figure S14.** (a) The average fluorescence intensity of HepG2 cells in Figure 4. (b) The average fluorescence intensity of LoVo cells in Figure S13.

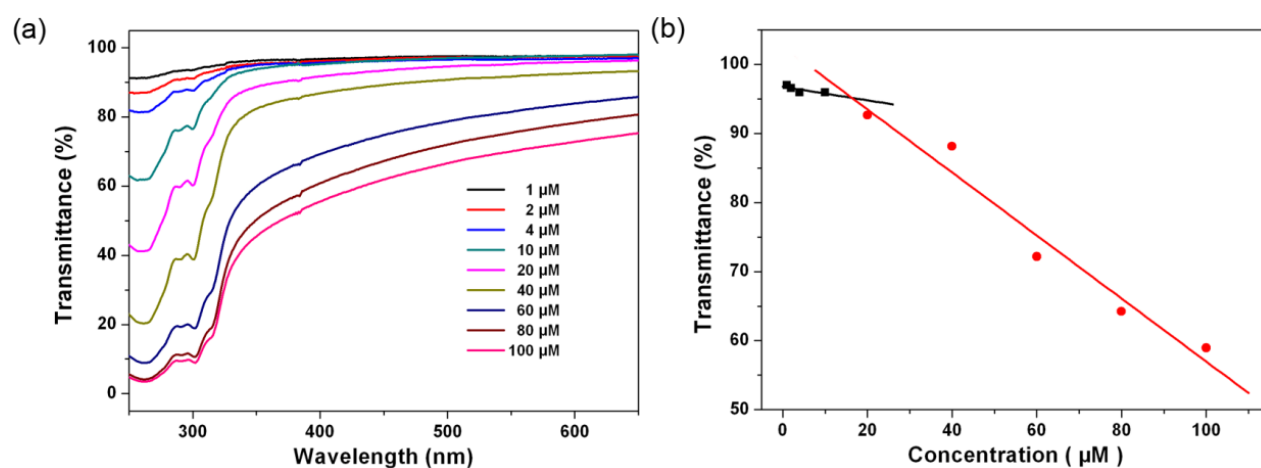

**Figure S15.** (a) UV-vis transmittance spectra of **1** at various concentrations in water (pH 5.5). (b) Concentration-dependent optical transmittance of **1** at 425 nm in water (pH 5.5).

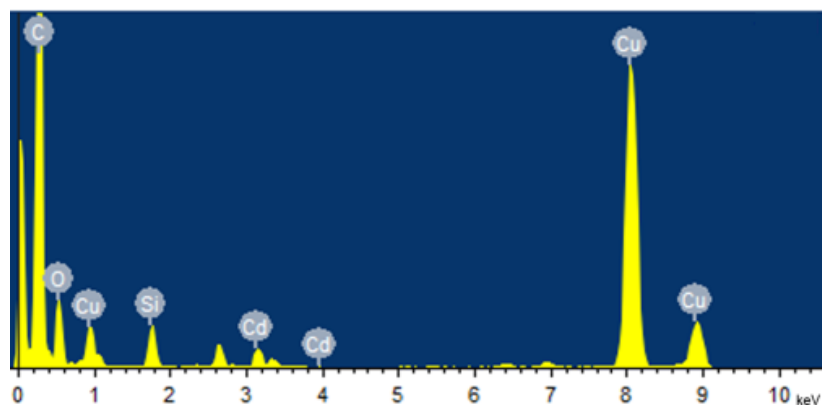

**Figure S16.** Energy-dispersive X-ray spectroscopic (EDS) elemental analysis of nanofibers in Figure 6c.

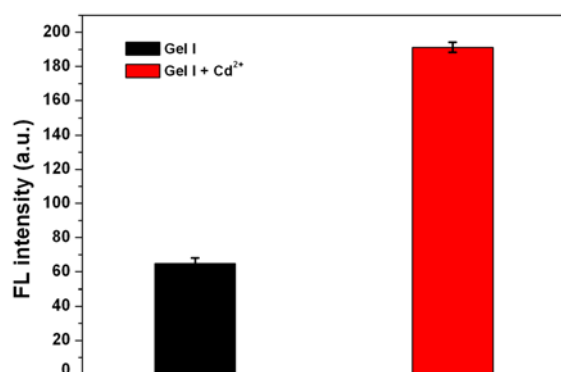

**Figure S17.** The average fluorescence intensity in Figures 6b & d.

### 3. Supporting Tables.

**Table S1.** HPLC condition for the purification of **1**.

| Time (minute) | Flow (mL/min.) | H <sub>2</sub> O % | CH <sub>3</sub> CN% |
|---------------|----------------|--------------------|---------------------|
| 0             | 3.0            | 30                 | 70                  |
| 3             | 3.0            | 30                 | 70                  |
| 35            | 3.0            | 0                  | 100                 |
| 37            | 3.0            | 0                  | 100                 |
| 38            | 3.0            | 30                 | 70                  |
| 40            | 3.0            | 30                 | 70                  |

**Table S2.** Using **1** to detect of Cd<sup>2+</sup> in pond water (from east campus of USTC).

| Sample     | Level added (μM) | Level found (μM) | Recovery (%) | SD (μM) | RSD (%) |
|------------|------------------|------------------|--------------|---------|---------|
| pond water | 10               | 9.71             | 97           | 0.039   | 0.406   |
|            |                  | 9.66             | 96           |         |         |
|            |                  | 9.64             | 96           |         |         |

**Table S3.** Statistics of sensitivity of **1** and other reported methods for the detection of Cd<sup>2+</sup>.

| Method                                                                                  |                                                                               | LOD | The limit of detection (LOD) of Cd <sup>2+</sup>                                                                   |
|-----------------------------------------------------------------------------------------|-------------------------------------------------------------------------------|-----|--------------------------------------------------------------------------------------------------------------------|
| Fluorometry                                                                             | In this paper                                                                 |     | $2.10 \times 10^{-8}$ M                                                                                            |
|                                                                                         | Cheng <i>et al.</i> reported a small molecule-based chemosensors <sup>1</sup> |     | $1.00 \times 10^{-7}$ M                                                                                            |
|                                                                                         | Varriale <i>et al.</i> reported protein-based sensing systems <sup>2</sup>    |     | $5.00 \times 10^{-7}$ M                                                                                            |
| Atomic absorption spectrometry (AAS) <sup>3</sup>                                       |                                                                               |     | $4.20 \times 10^{-11}$ M                                                                                           |
| Inductively coupled plasmas-Atomic fluorescence spectrometry (ICP-AFS) <sup>4</sup>     |                                                                               |     | $3.56 \times 10^{-9}$ M                                                                                            |
| Inductively coupled plasmas-atomic emission spectrometry (ICP-AES) <sup>5</sup>         |                                                                               |     | $1.78 \times 10^{-6}$ M                                                                                            |
| Inductively coupled plasma mass spectrometry (ICP-MS) <sup>6</sup>                      |                                                                               |     | $8.90 \times 10^{-11}$ M                                                                                           |
| X-ray fluorescence <sup>7</sup>                                                         |                                                                               |     | $1.78 \times 10^{-4}$ - $1.27 \times 10^{-3}$ M                                                                    |
| Liquid chromatography with electrochemical or spectrophotometric detection <sup>8</sup> |                                                                               |     | $8.90 \times 10^{-7}$ M for electrochemical detection;<br>$1.78 \times 10^{-8}$ M for spectrophotometric detection |
| Surface enhanced Raman scattering (SERS) <sup>9</sup>                                   |                                                                               |     | $1.00 \times 10^{-6}$ M                                                                                            |

#### 4. References.

- 1 T. Y. Cheng, Y. F. Xu, S. Y. Zhang, W. P. Zhu, X. H. Qian and L. P. Duan, *J. Am. Chem. Soc.*, 2008, **130**, 16160-16161.
- 2 A. Varriale, M. Staiano, M. Rossi and S. D'Auria, *Anal. Chem.*, 2007, **79**, 5760-5762.

- 3 D. Colbert, K. S. Johnson and K. H. Coale, *Anal. Chim. Acta* 1998, **377**, 255-262.
- 4 A. Montaser and V. A. Fassel, *Anal. Chem.*, 1976, **48**, 1490-1499.
- 5 A. C. Davis, C. P. Calloway and B. T. Jones, *Talanta*, 2007, **71**, 1144-1149.
- 6 S. N. Willie, Y. Iida and J. W. McLaren, *Atom. Spectrosc.*, 1998, **19**, 67-72.
- 7 L. Ahlgren and S. Mattsson, *Phys. Med. Biol.*, 1981, **26**, 19-26.
- 8 A. M. Bond and G. G. Wallace, *Anal. Chem.*, 1984, **56**, 2085-2090.
- 9 J. Yin, T. Wu, J. B. Song, Q. Zhang, S. Y. Liu, R. Xu and H. W. Duan, *Chem. Mater.*, 2011, **23**, 4756-4764.
